# Supplementary material
Source: PubMed Central journal article supplement (PMC6761593)
Supplement: Supp_Fig2.pdf [file Supp_Fig2.pdf]

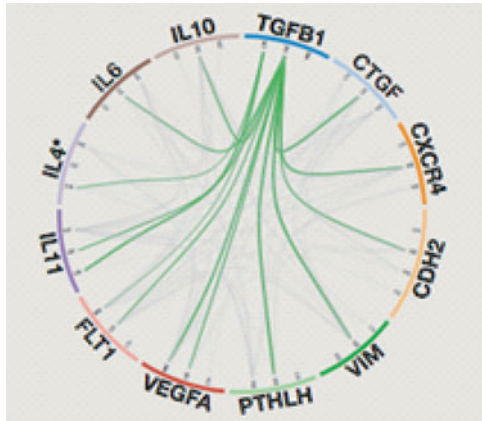

**Supplementary Figure S2.** Circos plot of transcriptional interactions between TGF $\beta$ -1 (TGF $\beta$ 1 in the figure) and its target genes from Zodiac database. Zodiac records functional interactions between molecular entities in human cancer, which are derived based on TCGA data using Bayesian graphical model. In the figure, *green lines* indicate statistically significant (FDR  $\leq 0.1$ ) positive interactions between gene expressions of TGF $\beta$ -1 and its target genes. Only interactions between gene expressions are shown. Interactions between gene expressions of TGF $\beta$ -1 target genes have *faded color*. FDR, false discovery rate; TGF $\beta$ , transforming growth factor  $\beta$ .

---
