# Supplementary material
Source: PubMed Central journal article supplement (PMC6761593)
Supplement: Supp_Fig3.pdf [file Supp_Fig3.pdf]

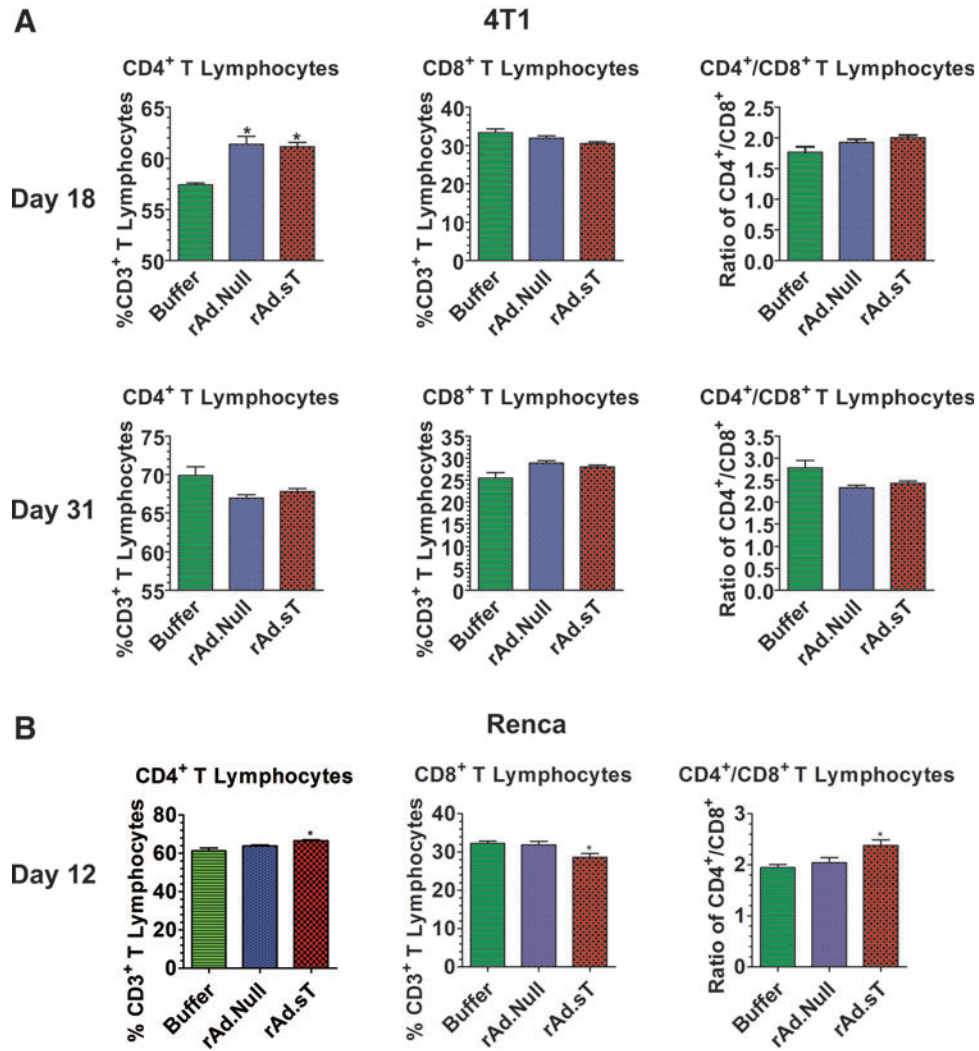

**Supplementary Figure S3.** Analysis of CD4<sup>+</sup> and CD8<sup>+</sup> T lymphocytes in the spleen. Following viral vector treatments, the spleens were isolated on day 18 and day 31 in 4T1 xenografts, and on day 12 in Renca model. Splenocytes were collected and labeled with APC-conjugated mouse CD3e, FITC-conjugated anti-mouse CD4, and PE-conjugated anti-mouse CD8 antibodies. The percentage of CD8<sup>+</sup> and CD4<sup>+</sup> T lymphocytes was analyzed by flow cytometry. The results from 4T1 and Renca models are presented in (A) and (B), respectively.
