# Supplementary material
Source: PubMed Central journal article supplement (PMC6761593)
Supplement: Supp_Fig4-Table1.pdf [file Supp_Fig4-Table1.pdf]

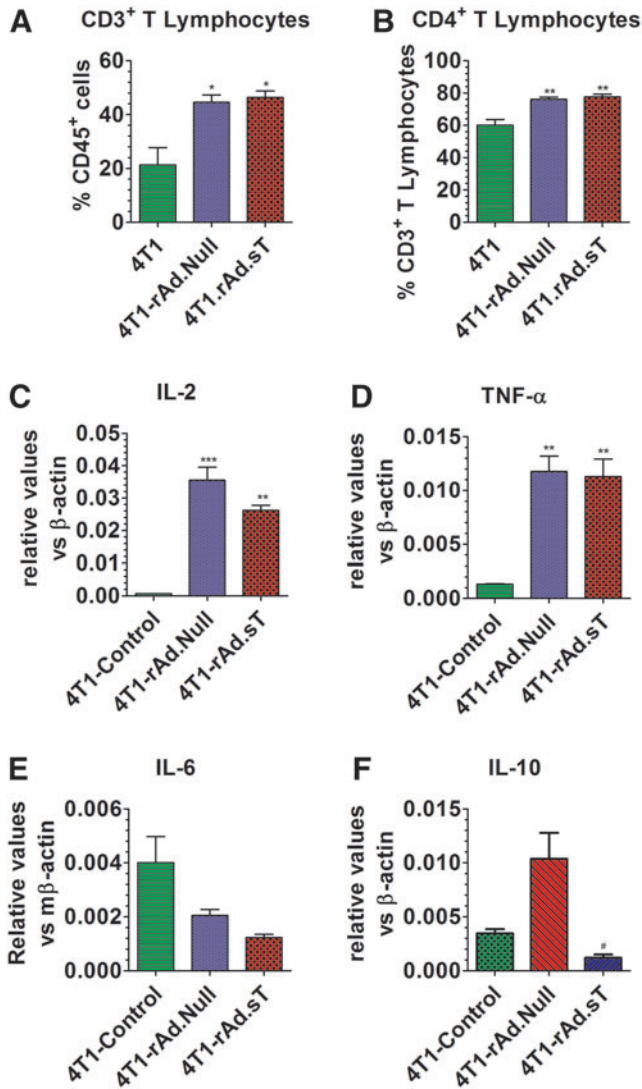

**Supplementary Figure S4.** rAd.sT mediated immune activation *in vitro*. Splensens were obtained from normal BALB/c mice, and single-cell suspensions were prepared. After treating with 1×RBC lysis buffer, splenocytes were cocultured with lysates obtained from rAd.sT- or rAd.Null (2.5×10<sup>4</sup> VPs/cell for 48 h)-infected cells. The immunophenotypes of splenocytes were detected by flow cytometry (A, B). The expression of cytokines, IL-2 (C), TNF-α (D), IL-6 (E), and IL-10 (F), was analyzed by real-time RT-PCR. Data are shown as mean±s.e.m. \**p*<0.05; \*\**p*<0.01; \*\*\**p*<0.001 versus 4T1 control group. RT-PCR, reverse transcription PCR.

**Supplementary Table S1.** Primers for therapeutic gene and mouse gene expression analysis

| Name             | Sequence                       |
|------------------|--------------------------------|
| TGFβRII Fc       |                                |
| Sense            | 5' gctgaatggcaaggagta 3'       |
| Antisense        | 5' ttgctttggagatggtt 3'        |
| Mouse IL-2       |                                |
| Sense            | 5' tgagtgccattcgatga 3'        |
| Antisense        | 5' agggcttggatgatgac 3'        |
| Mouse IL-6       |                                |
| Sense            | 5' gctacctggagtacatgaagaaca 3' |
| Antisense        | 5' ggtccttagccactcctctg 3'     |
| Mouse IL-10      |                                |
| Sense            | 5' aataagagcaaggcagtgagg 3'    |
| Antisense        | 5' tgatgcttctatgcagttgatga 3'  |
| Mouse IL-12p35   |                                |
| Sense            | 5' ccctcctaaaccacctca 3'       |
| Antisense        | 5' gggactggcctaagacacc 3'      |
| Mouse TNF-α      |                                |
| Sense            | 5' cgtggaactggcagaaga 3'       |
| Antisense        | 5' acagaagagcgtgtggc 3'        |
| Mouse TGFβ       |                                |
| Sense            | 5' ggcgggtgctccttctga 3'       |
| Antisense        | 5' ctcatagatggcgtgtgtg 3'      |
| Mouse IFNγ       |                                |
| Sense            | 5' actaccttctcagcaacagcaa 3'   |
| Antisense        | 5' ctggggaccactcgatga 3'       |
| Mouse perforin   |                                |
| Sense            | 5' acgcatgatctgctctcg 3'       |
| Antisense        | 5' tcgggttctgttctcca 3'        |
| Mouse granzyme B |                                |
| Sense            | 5' tgtgctatggtgctgtt 3'        |
| Antisense        | 5' cactccgatcctctgt 3'         |
| Mouse VEGFA      |                                |
| Sense            | 5' ctacctccaccatgccaagt 3'     |
| Antisense        | 5' gcagatagctgcgctgataga 3'    |
| Mouse VEGFR1     |                                |
| Sense            | 5' acggacagtggatggtt 3'        |
| Antisense        | 5' cacagactccctgctttt 3'       |
| Mouse IL-11      |                                |
| Sense            | 5' cagggtgctctccctaa 3'        |
| Antisense        | 5' gagtgcgcttccagtcg 3'        |
| Mouse CTGF       |                                |
| Sense            | 5' gtgaagacatacagggttaa 3'     |
| Antisense        | 5' actggcagagtgggtt 3'         |
| Mouse PTHrP      |                                |
| Sense            | 5' caactccaaacctgctcc 3'       |
| Antisense        | 5' gtatctgcctcatctgctc 3'      |
| Mouse CXCR4      |                                |
| Sense            | 5' ggggtcatcaagcaagga 3'       |
| Antisense        | 5' agtgaagaaggcgagg 3'         |
| Mouse β-actin    |                                |
| Sense            | 5' cccatctacgaggctat 3'        |
| Antisense        | 5' tgtcacgcacgattcc 3'         |
