# Supplementary material
Source: PubMed Central journal article supplement (PMC6761593)
Supplement: Supp_Table2.pdf [file Supp_Table2.pdf]

**Supplementary Table S2. Primers for analysis of human gene expression**

| <i>Name</i>          | <i>Sequence</i>            |
|----------------------|----------------------------|
| Human TGF $\beta$    |                            |
| Sense                | 5' gcaacaattcctggcgatac 3' |
| Antisense            | 5' caaccactgccgacaact 3'   |
| Human CTGF           |                            |
| Sense                | 5' ggcccttctgtgacttcg 3'   |
| Antisense            | 5' actggcagagtgggtt 3'     |
| Human PTHrP          |                            |
| Sense                | 5' cgattgggtctgatgat 3'    |
| Antisense            | 5' ttcccaggtgtcttgagc 3'   |
| Human CXCR4          |                            |
| Sense                | 5' acgccaccaacagtcaga 3'   |
| Antisense            | 5' aagtcgggaatagtcagc 3'   |
| Human $\beta$ -actin |                            |
| Sense                | 5' gggacctgactgactacctc 3' |
| Antisense            | 5' cttaatgtcacgcacgattt 3' |
